# Supplementary material for: Efficient pure near-infrared organic light-emitting diodes based on tris(2,4,6-trichlorophenyl)methyl radical derivatives
Source: Royal Society of Chemistry journal article supplement (doi:10.1039/d2tc03299f), 2022-01-01
Supplement: d2tc03299f1.pdf [file d2tc03299f1.pdf]

## **Efficient pure near-infrared organic light-emitting diodes based on tris(2,4,6-trichlorophenyl) methyl radical derivatives**

Junshuai Ding, Shengzhi Dong, Ming Zhang, Feng Li\*

State Key Laboratory of Supramolecular Structure and Materials, College of Chemistry, Jilin University, Qianjin Avenue 2699, Changchun, 130012, P. R. China

\*E-mail: [lifeng01@jlu.edu.cn](mailto:lifeng01@jlu.edu.cn)

### **Contents**

1. Synthesis
2. EPR spectra of TTM-3PDMAC and TTM-PDMAC
3. Electrochemical properties
4. Theoretical Calculations
5. Electroluminescence Performances
6. Summary of device performances of near infrared (NIR) OLED published to date
7. References

## General information

All reagents and solvents required for synthesis and characterization are purchased from commercial suppliers and used directly without any treatment. A Bruker Avance-III 500 NMR spectrometer was used for the  $^1\text{H}$  collection in  $\text{CDCl}_3$  and  $\text{CH}_2\text{Cl}_2$  solvent with tetramethylsilane as the internal standard. Mass spectra of all compounds were recorded on Thermo Fisher ITQ1100 GC-MS mass detector. A Shimadzu UV-2550 spectrophotometer was applied to record the ultraviolet (UV)-visible spectra. Fluorescence spectra were recorded using a RF-5301 PC spectrophotometer and QE pro. All of PLQEs are determined with a calibrated integrating sphere system and using QE pro of Ocean Insight as fluorescence spectrometer. The electrochemical oxidation and reduction potentials were recorded using an electrochemical analyzer (CHI660C, CH Instruments, USA). The fluorescence decay spectra were recorded on an Edinburgh fluorescence spectrometer (FLS980), and the lifetime of the excited states was measured by the time-correlated single photon counting method under the excitation of a laser (375 nm). Thermal gravimetric analysis (TGA) were characterized by a TA INSTRUMENTS Q500 TGA analyzer. Ready-made indium tin oxide (ITO) glass substrates were purchased and cleaned. After dried with  $\text{N}_2$ , they were treated with UV irradiation for 20 min and next transferred to a vacuum deposition system with the pressure of  $4\text{-}6 \times 10^{-6}$  mbar. The  $\text{MoO}_3$  layer was deposited at a rate of  $0.3 \text{ \AA s}^{-1}$ . All the organic layers were deposited at  $0.4\text{-}0.6 \text{ \AA s}^{-1}$ . The evaporation rate of cathode LiF and Al metal layer were  $0.1 \text{ \AA s}^{-1}$  and  $0.8\text{-}1.4 \text{ \AA s}^{-1}$  respectively. The current-voltage characteristics were measured using a Keithley 2400 programmable electrometer. The EL spectra and EQEs were measured using QE pro spectroradiometer of Ocean Insight

together with a calibrated integrating sphere at room temperature in glove box.

## 1. Synthesis

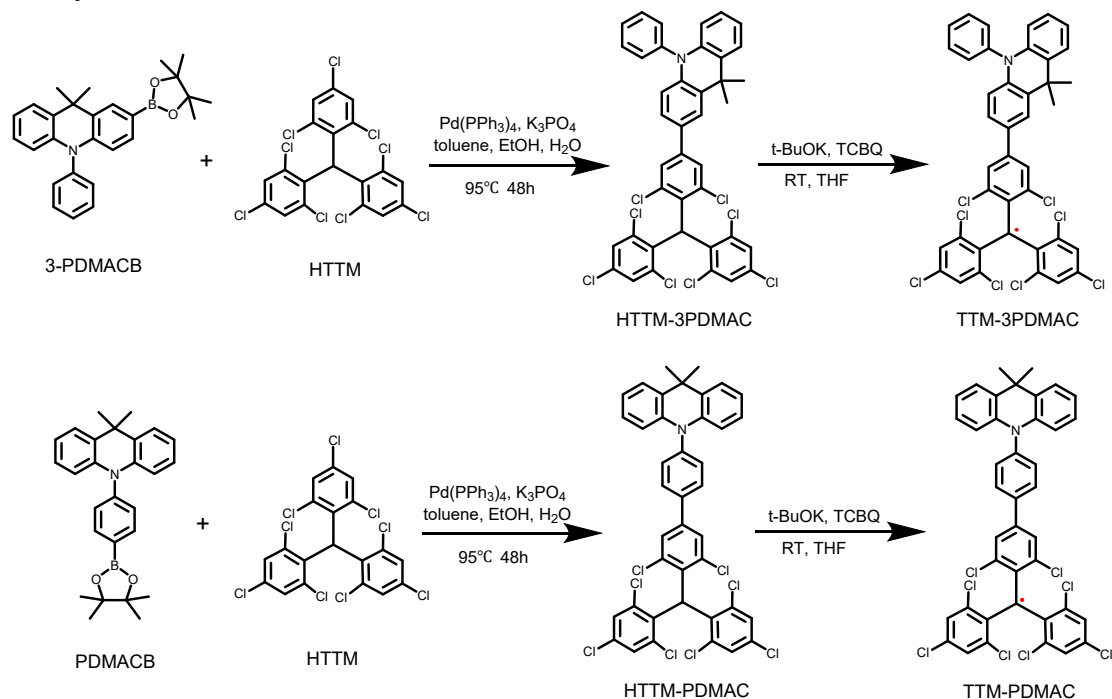

Scheme 1. Synthetic routes and chemical structures of TTM-3PDMAC and TTM-PDMAC.

The HTTM<sup>1</sup> and 3-PDMACB<sup>2</sup> and PDMACB<sup>3</sup> were prepared as reported.

### (1) Synthesis of HTTM-3PDMAC

HTTM (1.0 g, 1.80 mmol) and the pinacol borane of 3-PDMAC (0.67 g, 1.80 mmol) was dissolved in a mixed solvent of toluene (12 ml), K<sub>3</sub>PO<sub>4</sub> aqueous solution (8 ml, 2 mol / L) and ethanol (4 ml), and catalyst Pd(PPh<sub>3</sub>)<sub>4</sub> (0.10 g, 0.09 mmol) was added under argon atmosphere. The mixture was stirred at 95°C for 48 h under argon atmosphere. After the reaction mixture cooling to room temperature, the solution was extracted with dichloromethane, organic layer was collected and dried. The solvent was removed under vacuum and the crude product was purified by silica gel column chromatography (using petroleum ether: dichloromethane = 10:1 v/v). HTTM-3PDMAC was obtained as a white solid. GC-MS (m/z): calculated for C<sub>40</sub>H<sub>25</sub>Cl<sub>8</sub>N,

802.94; found, 803.37;  $^1\text{H}$  NMR (500 MHz,  $\text{CDCl}_3$ )  $\delta$ 7.68 – 7.62 (m, 3H), 7.56 – 7.46 (m, 3H), 7.40 – 7.33 (m, 5H), 7.24 (t,  $J = 2.3$  Hz, 2H), 7.19 (dd,  $J = 8.6, 2.0$  Hz, 1H), 7.05 – 6.95 (m, 2H), 6.78 (s, 1H), 6.34 (d,  $J = 8.6$  Hz, 1H), 6.31 (dd,  $J = 7.9, 1.0$  Hz, 1H), 1.78 (s, 3H), 1.77 (s, 3H).

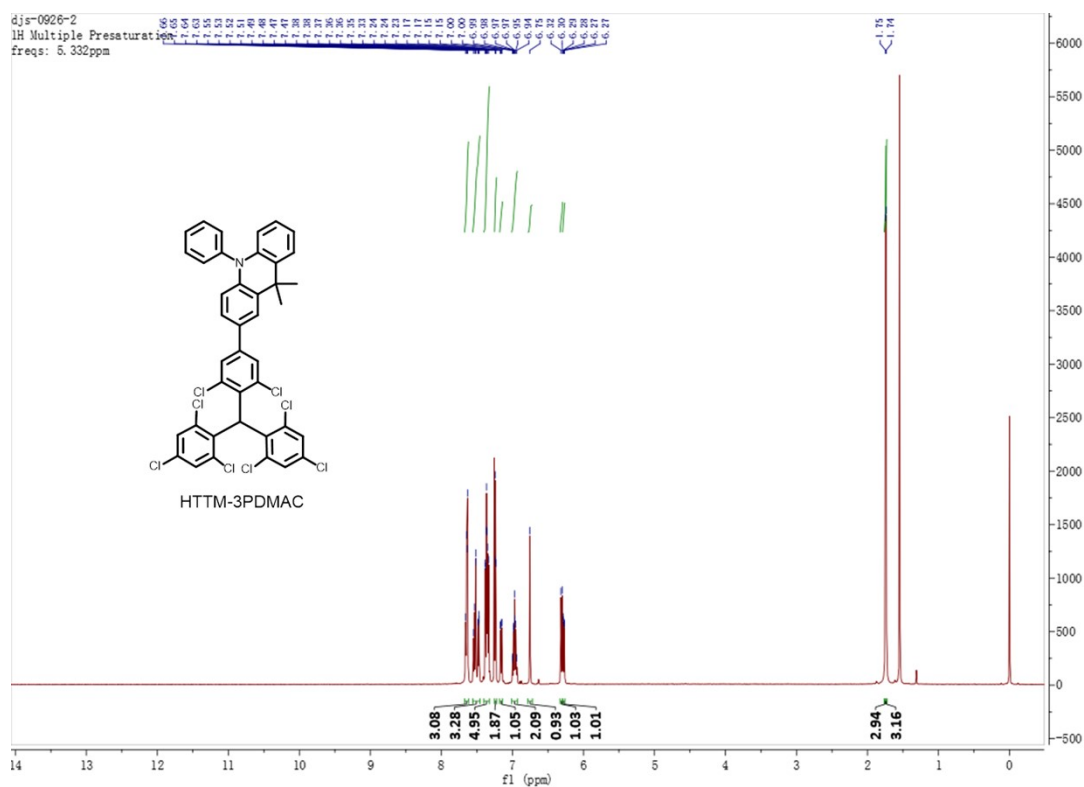

Figure S1.  $^1\text{H}$  NMR spectrum of HTTM-3PDMAC in  $\text{CDCl}_3$ .

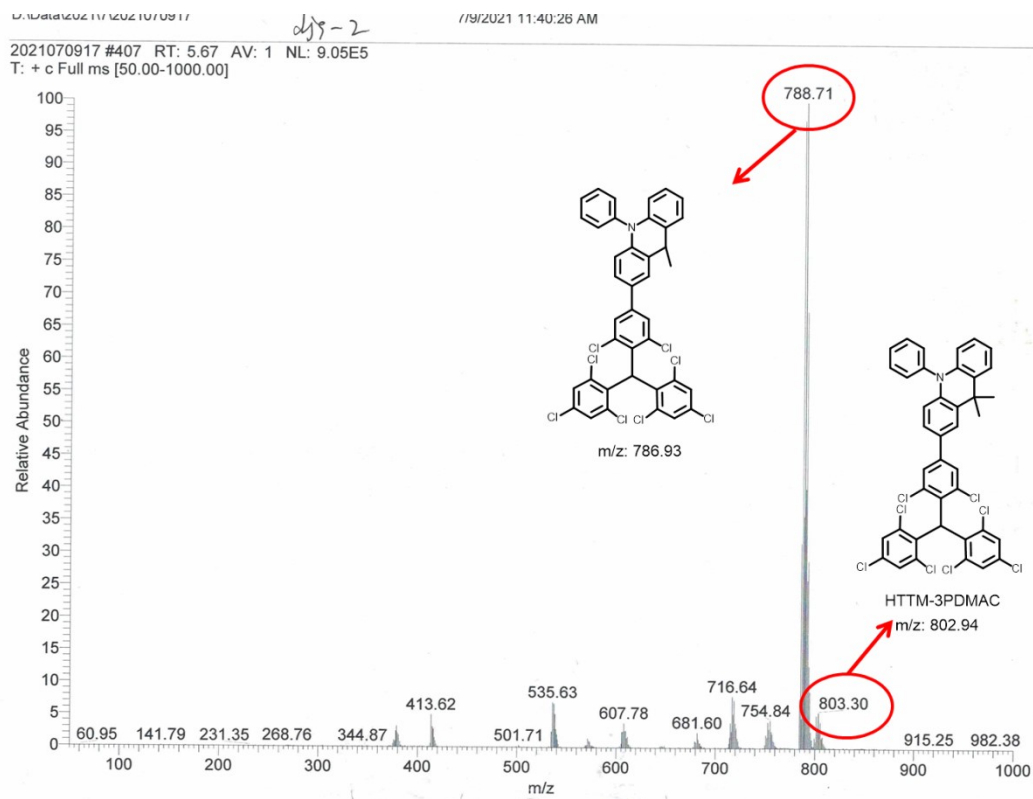

Figure S2. Mass Spectrum of HTTM-3PDMAC.

## (2) Synthesis of TTM-3PDMAC

Under argon atmosphere and in the dark, the HTTM-3PDMAC (1.00 equiv) was dissolved in dry THF (40 ml). Then KOtBu (4.00 equiv) was added, the solution become claret-colored immediately. The solution was stirred for 5 h in the dark at room temperature, and then p-Chloranil (5 equiv) was added. The solution was stirred for further 1 h. After the reaction finished, the solvent was removed under vacuum and the crude product was purified by silica gel column chromatography (using petroleum ether: dichloromethane = 10:1v/v). The crude product was recrystallized twice from dichloromethane and methanol and a green solid was obtained. GC-MS (m/z): calculated for  $C_{40}H_{25}Cl_8N$ , 801.94; found, 802.46;

2022062408 #398 RT: 5.54 AV: 1 NL: 4.90E4  
T: + c Full ms [50.00-1000.00]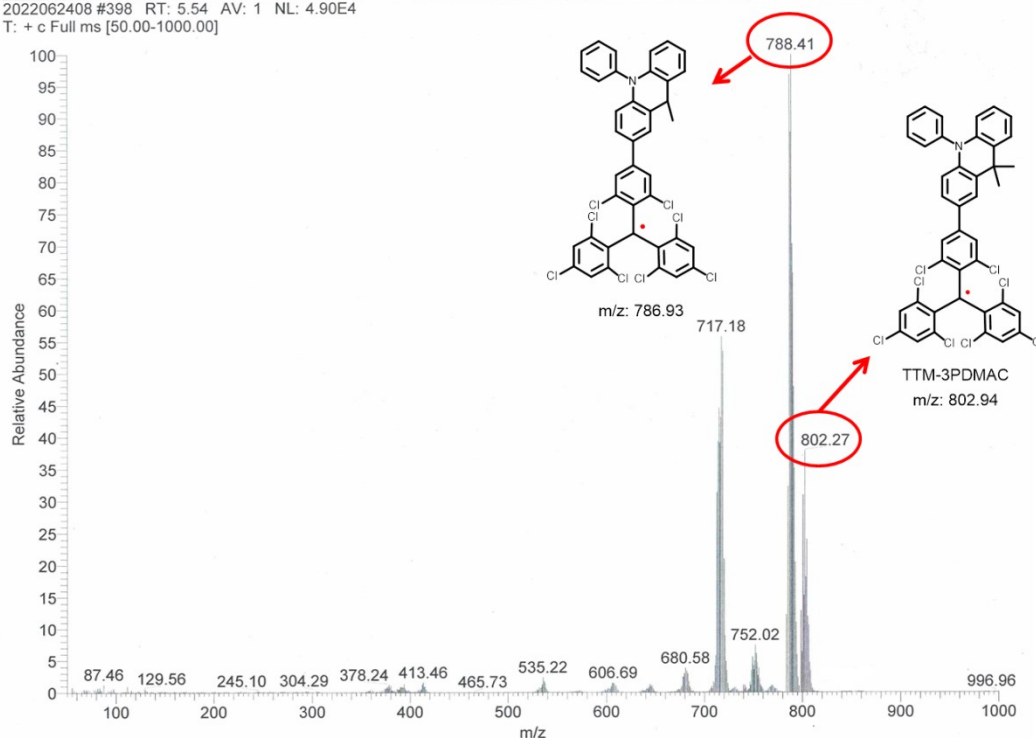

Figure S3. Mass Spectrum of TTM-3PDMAC.

### (3) Synthesis of HTTM-PDMAC

HTTM (1.0 g, 1.80 mmol) and the pinacol borane of PDMAC (0.67 g, 1.80 mmol) was dissolved in a mixed solvent of toluene (12 ml),  $K_3PO_4$  aqueous solution (8 ml, 2 M) and ethanol (4 ml), and catalyst  $Pd(PPh_3)_4$  (0.10 g, 0.09 mmol) was added under argon atmosphere. The mixture was stirred at 95°C for 48 h under argon atmosphere and in the dark. After the reaction mixture cooling to room temperature, the solution was extracted with dichloromethane, organic layer was collected and dried. The solvent was removed under vacuum and the crude product was purified by silica gel column chromatography (using petroleum ether: dichloromethane = 10:1 v/v). HTTM-PDMAC was obtained as a white solid. GC-MS (m/z): calculated for  $C_{40}H_{25}Cl_8N$ , 802.94; found, 803.37;  $^1H$  NMR (500 MHz,  $CD_2Cl_2$ )  $\delta$  7.91 (d,  $J = 7.9$  Hz, 2H), 7.77 (d,  $J = 1.8$  Hz, 1H), 7.64 (d,  $J = 1.8$  Hz, 1H), 7.54 – 7.44 (m, 5H), 7.34 (d,  $J = 2.0$  Hz, 1H), 7.08 – 6.92

(m, 4H), 6.86 (s, 1H), 6.33 (d, J = 6.0 Hz, 2H), 1.72 (s, 6H).

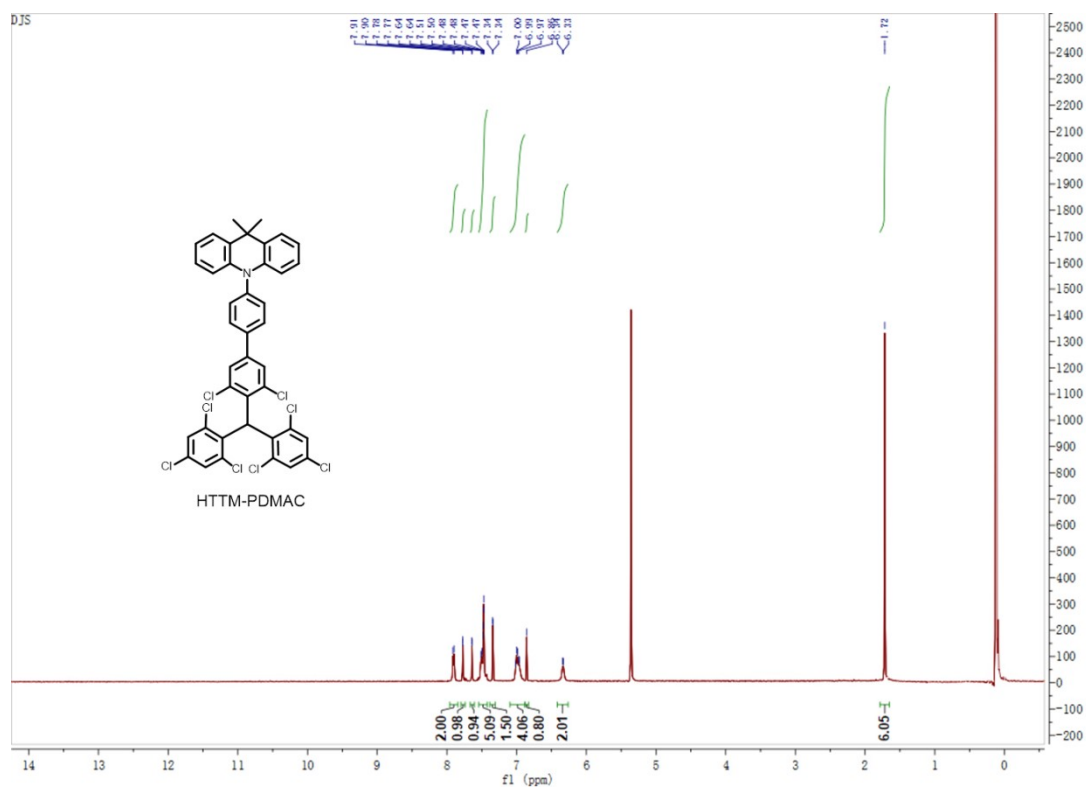

Figure S4.  $^1\text{H}$  NMR spectrum of HTTPM-PDMAC in  $\text{CD}_2\text{Cl}_2$ .

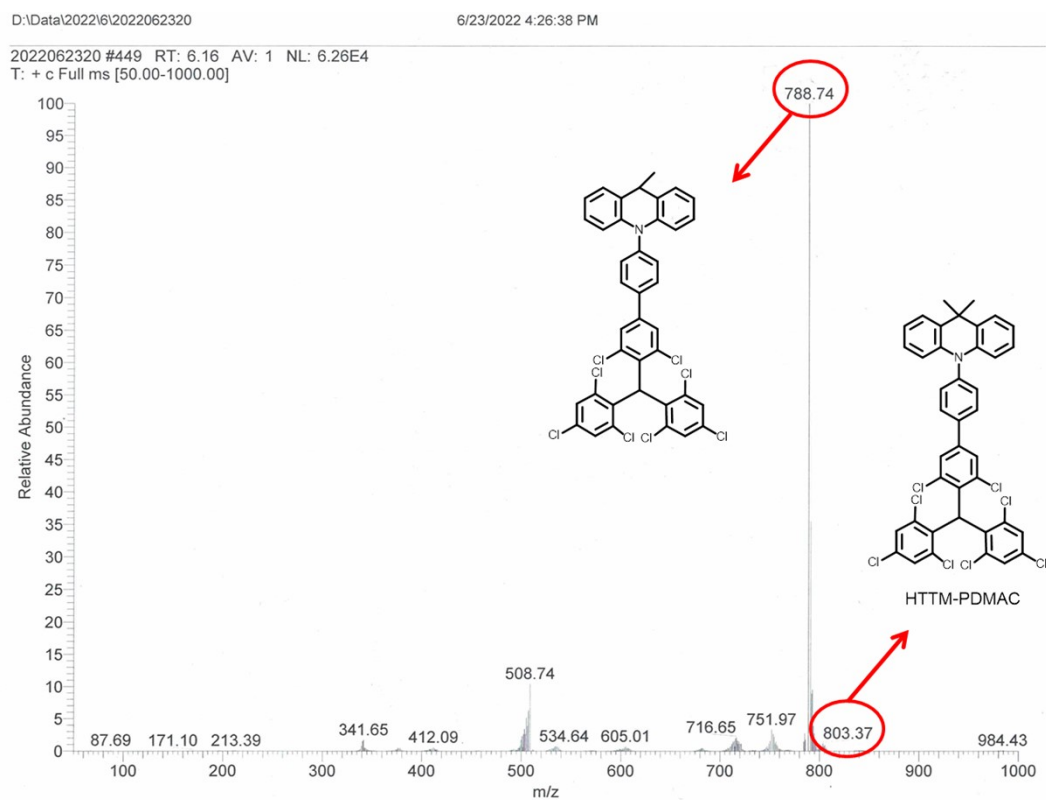

Figure S5. Mass Spectrum of HTTPM-PDMAC.

#### (4) Synthesis of TTM-PDMAC

Under argon atmosphere and in the dark, the TTM-PDMAC (1.00 equiv) was dissolved in dry THF (40 ml). Then KOtBu (10.00 equiv) was added, the solution become claret-colored immediately. The solution was stirred for 5 h in the dark at room temperature, and then p-Chloranil (5 equiv) was added. The solution was stirred for further 1 h. After the reaction finished, the solvent was removed under vacuum and the crude product was purified by silica gel column chromatography (using petroleum ether: dichloromethane = 10:1v/v). The crude product was recrystallized twice from dichloromethane and methanol and a gray solid was obtained. GC-MS (m/z): calculated for  $C_{40}H_{24}Cl_8N$ , 801.94; found, 802.46.

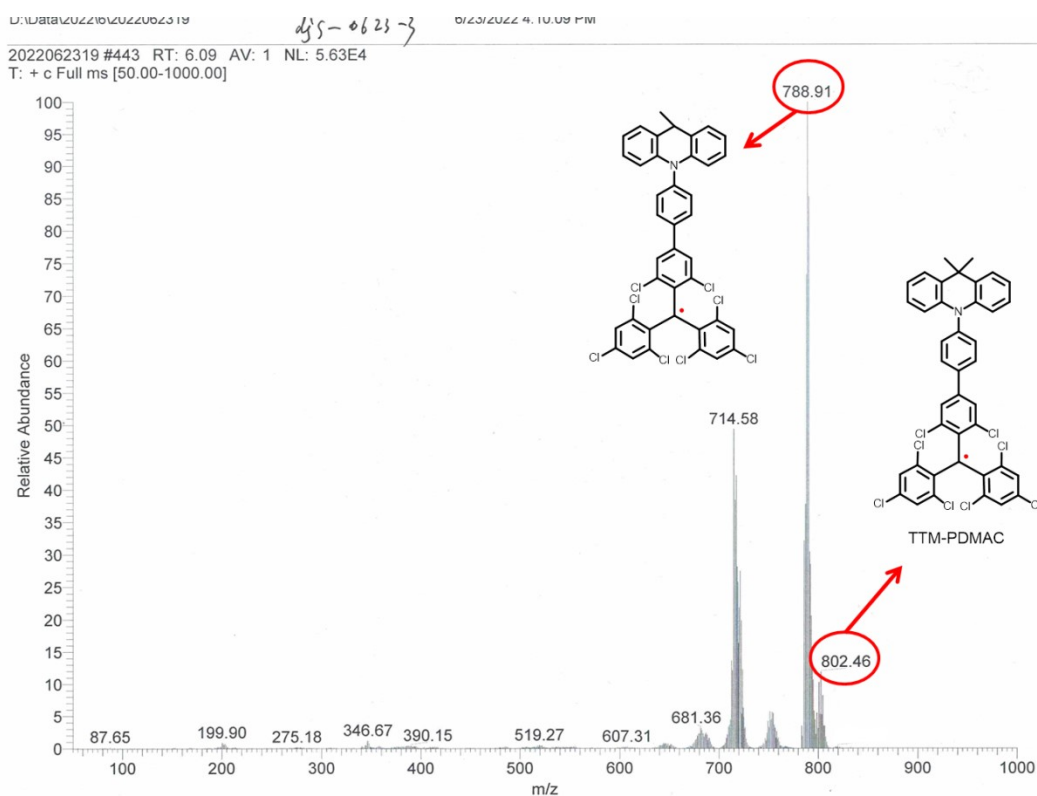

Figure S6. Mass Spectrum of TTM-PDMAC.



## 2. EPR spectra of TTM-3PDMAC and TTM-PDMAC

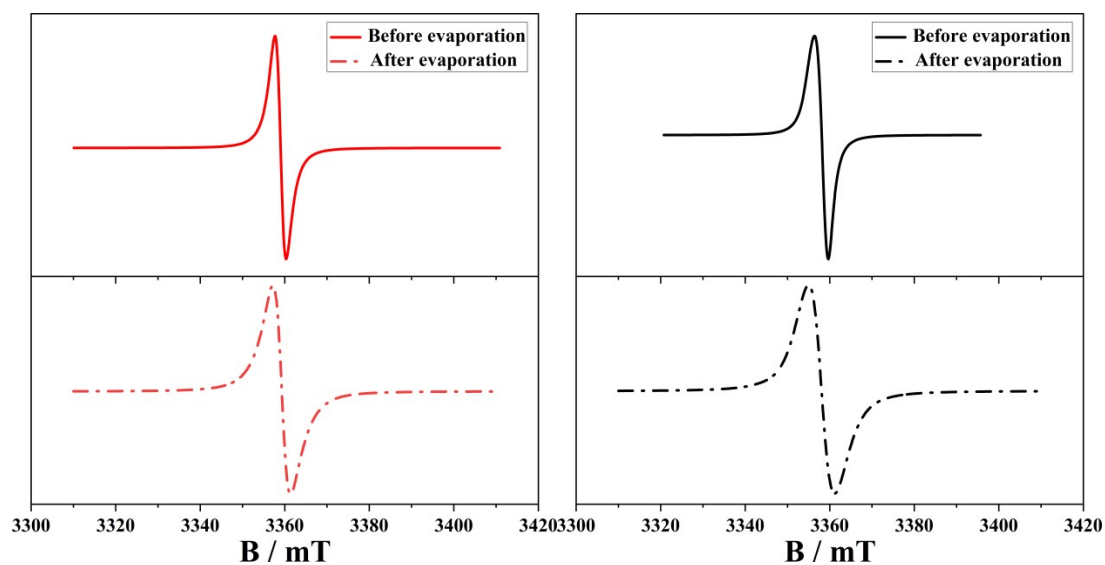

Figure S7. EPR spectra of TTM-3PDMAC (red) and TTM-PDMAC (black).

## 3. Electrochemical properties

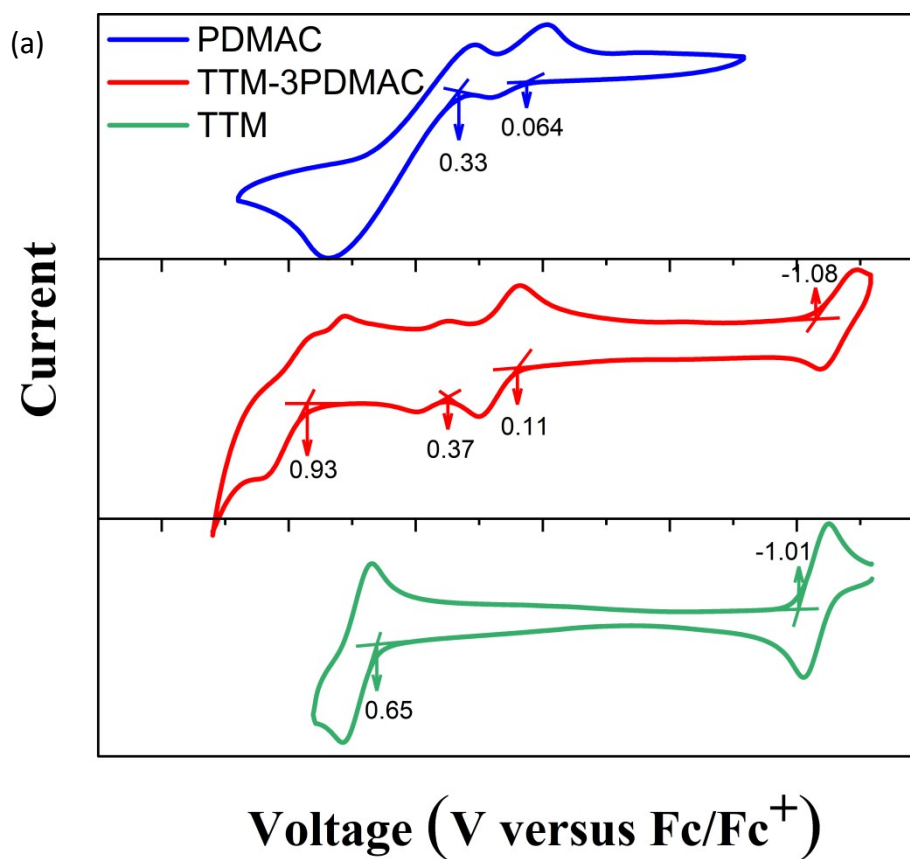

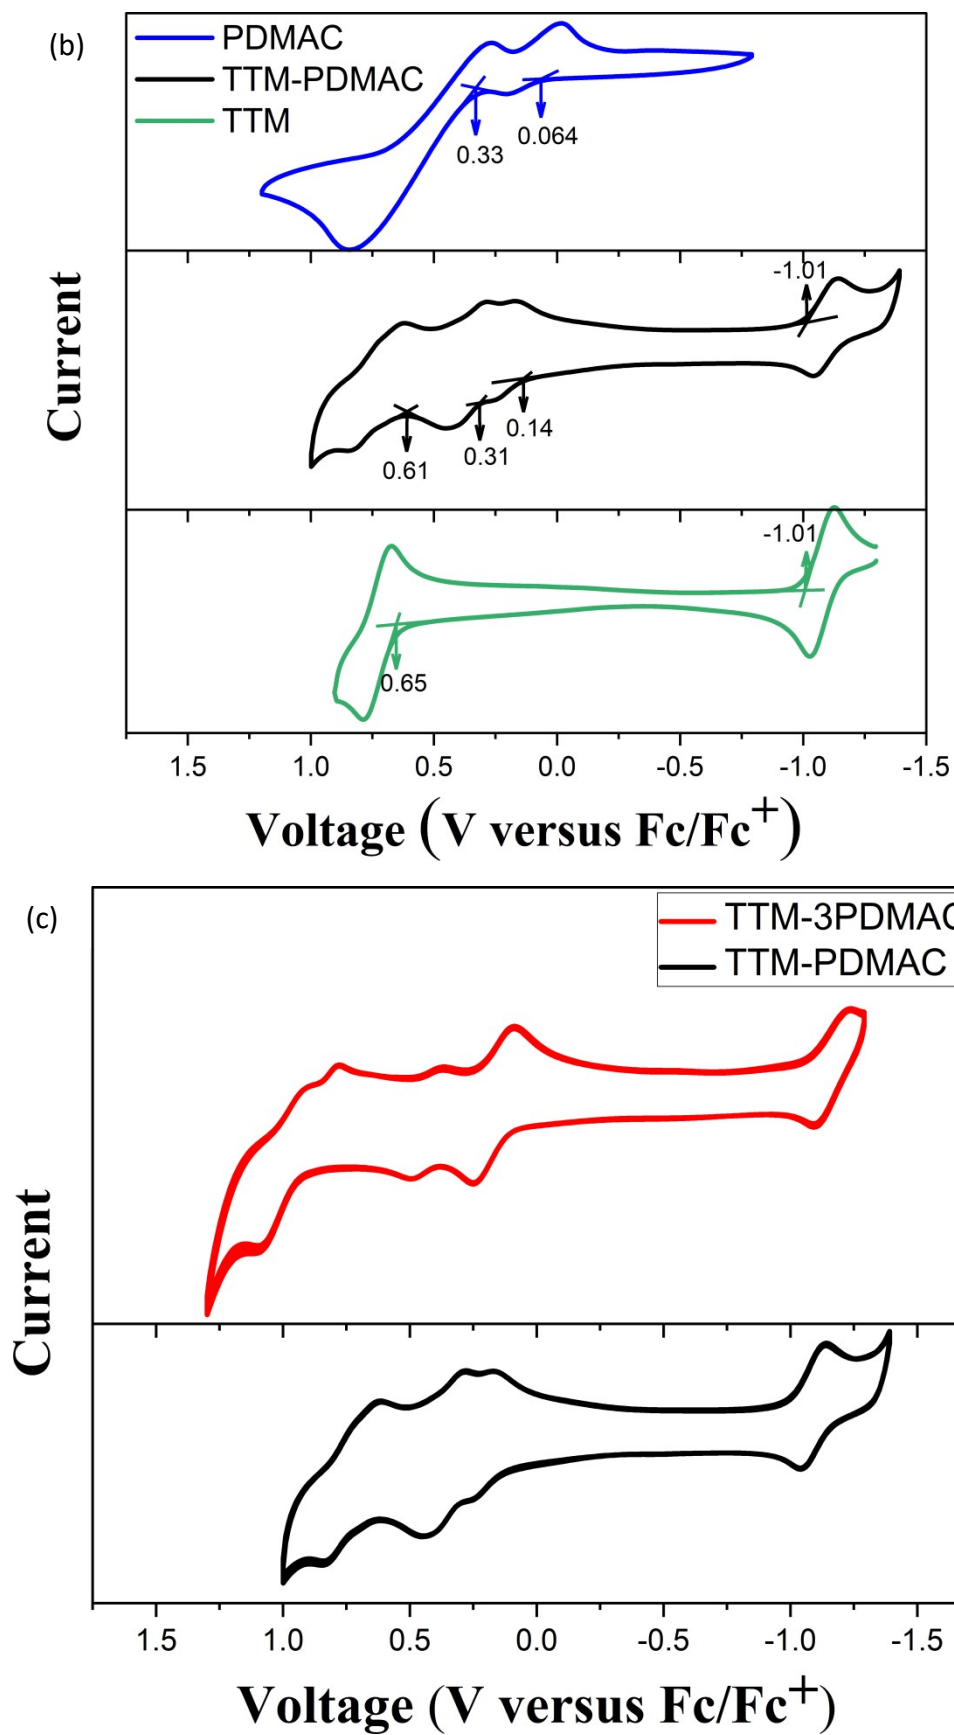

#### 4. Quantum chemical calculations

Table S1. Cartesian coordinates of the optimized ground state geometries by DFT calculation (UB3LYP/6-31G(d, p))

TTM-3PDMAC:

| Center Number | Atomic Number | Atomic Type | Coordinates (Angstroms) |           |           |
|---------------|---------------|-------------|-------------------------|-----------|-----------|
|               |               |             | X                       | Y         | Z         |
| 1             | 6             | 0           | 0.012310                | 1.220087  | -0.080889 |
| 2             | 6             | 0           | -1.373197               | 1.175807  | 0.073692  |
| 3             | 6             | 0           | -1.960242               | 0.146539  | 0.809655  |
| 4             | 6             | 0           | -1.161769               | -0.838416 | 1.390867  |
| 5             | 6             | 0           | 0.223709                | -0.794198 | 1.236214  |
| 6             | 6             | 0           | 0.810783                | 0.235132  | 0.500324  |
| 7             | 6             | 0           | -3.447244               | 0.099023  | 0.975713  |
| 8             | 6             | 0           | -4.067126               | 1.259658  | 0.261791  |
| 9             | 6             | 0           | -3.972421               | -1.178787 | 0.399174  |
| 10            | 17            | 0           | -2.357233               | 2.389624  | -0.642748 |
| 11            | 17            | 0           | -1.885281               | -2.106856 | 2.297813  |
| 12            | 6             | 0           | -4.265085               | 2.466246  | 0.932944  |
| 13            | 6             | 0           | -4.842788               | 3.547636  | 0.267731  |
| 14            | 6             | 0           | -5.222370               | 3.422404  | -1.068583 |
| 15            | 6             | 0           | -5.024331               | 2.215870  | -1.739760 |
| 16            | 6             | 0           | -4.446707               | 1.134426  | -1.074524 |
| 17            | 6             | 0           | -4.959891               | -1.895065 | 1.075443  |
| 18            | 6             | 0           | -5.449127               | -3.085755 | 0.538268  |
| 19            | 6             | 0           | -4.950963               | -3.560009 | -0.675164 |
| 20            | 6             | 0           | -3.963579               | -2.843701 | -1.351477 |
| 21            | 6             | 0           | -3.474257               | -1.653041 | -0.814258 |
| 22            | 17            | 0           | -3.797129               | 2.620592  | 2.579806  |
| 23            | 17            | 0           | -4.202676               | -0.352628 | -1.901614 |
| 24            | 17            | 0           | -2.257296               | -0.770210 | -1.647670 |
| 25            | 17            | 0           | -5.573923               | -1.310475 | 2.570830  |
| 26            | 17            | 0           | -5.553942               | -5.027376 | -1.337139 |
| 27            | 17            | 0           | -5.934286               | 4.755124  | -1.888337 |
| 28            | 6             | 0           | 2.138861                | 0.277615  | 0.352095  |
| 29            | 6             | 0           | 2.863023                | -0.905169 | 0.207189  |
| 30            | 6             | 0           | 4.256012                | -0.867155 | 0.042447  |
| 31            | 6             | 0           | 4.919569                | 0.369841  | 0.009810  |
| 32            | 6             | 0           | 4.186449                | 1.548530  | 0.180542  |
| 33            | 6             | 0           | 2.800358                | 1.503530  | 0.342282  |
| 34            | 6             | 0           | 5.034779                | -2.156714 | -0.094926 |
| 35            | 6             | 0           | 6.521720                | -2.002042 | -0.326363 |

|    |   |   |           |           |           |
|----|---|---|-----------|-----------|-----------|
| 36 | 6 | 0 | 7.108158  | -0.726316 | -0.346457 |
| 37 | 7 | 0 | 6.317920  | 0.407234  | -0.102219 |
| 38 | 6 | 0 | 7.321857  | -3.138524 | -0.518701 |
| 39 | 6 | 0 | 8.696111  | -3.006767 | -0.715361 |
| 40 | 6 | 0 | 9.280767  | -1.742421 | -0.712737 |
| 41 | 6 | 0 | 8.490763  | -0.607466 | -0.520244 |
| 42 | 6 | 0 | 6.898426  | 1.525194  | 0.024014  |
| 43 | 6 | 0 | 6.767982  | 2.249393  | 1.210153  |
| 44 | 6 | 0 | 8.306732  | 3.264903  | -0.880337 |
| 45 | 6 | 0 | 7.666734  | 2.032236  | -1.019911 |
| 46 | 6 | 0 | 4.455947  | -2.929522 | -1.272742 |
| 47 | 6 | 0 | 4.893888  | -2.872442 | 1.242016  |
| 48 | 1 | 0 | 0.475293  | 2.031813  | -0.661187 |
| 49 | 1 | 0 | 0.853380  | -1.571016 | 1.694546  |
| 50 | 1 | 0 | -4.999017 | 4.499191  | 0.797009  |
| 51 | 1 | 0 | -5.323644 | 2.117159  | -2.793642 |
| 52 | 1 | 0 | -6.227815 | -3.650728 | 1.071606  |
| 53 | 1 | 0 | -3.570770 | -3.217714 | -2.308459 |
| 54 | 1 | 0 | 2.339800  | -1.872648 | 0.222095  |
| 55 | 1 | 0 | 4.705690  | 2.518241  | 0.187454  |
| 56 | 1 | 0 | 2.230347  | 2.436669  | 0.462031  |
| 57 | 1 | 0 | 6.862898  | -4.138193 | -0.514336 |
| 58 | 1 | 0 | 9.317910  | -3.900465 | -0.872423 |
| 59 | 1 | 0 | 10.365535 | -1.638137 | -0.862416 |
| 60 | 1 | 0 | 8.959304  | 0.387643  | -0.505162 |
| 61 | 1 | 0 | 6.159188  | 1.843047  | 2.031281  |
| 62 | 1 | 0 | 8.912491  | 3.660039  | -1.709146 |
| 63 | 1 | 0 | 7.769600  | 1.461717  | -1.954751 |
| 64 | 1 | 0 | 4.597667  | -2.342731 | -2.207815 |
| 65 | 1 | 0 | 4.978284  | -3.907852 | -1.366558 |
| 66 | 1 | 0 | 3.369417  | -3.102659 | -1.104677 |
| 67 | 1 | 0 | 4.380329  | -3.847932 | 1.088900  |
| 68 | 1 | 0 | 5.903527  | -3.049370 | 1.675714  |
| 69 | 1 | 0 | 4.295142  | -2.243385 | 1.938118  |
| 70 | 6 | 0 | 8.185968  | 4.006303  | 0.306316  |
| 71 | 1 | 0 | 8.681479  | 4.949922  | 0.400935  |
| 72 | 6 | 0 | 7.405328  | 3.491079  | 1.366963  |
| 73 | 1 | 0 | 7.297727  | 4.036581  | 2.281156  |

-----

TTM-PDMAC:

-----

| Center<br>Number | Atomic<br>Number | Atomic<br>Type | Coordinates (Angstroms) |   |   |
|------------------|------------------|----------------|-------------------------|---|---|
|                  |                  |                | X                       | Y | Z |

---

|    |    |   |           |           |           |
|----|----|---|-----------|-----------|-----------|
| 1  | 6  | 0 | 4.247801  | 1.135347  | 0.516725  |
| 2  | 6  | 0 | 3.667047  | -0.160854 | 0.989585  |
| 3  | 6  | 0 | 4.241756  | -1.286491 | 0.187301  |
| 4  | 6  | 0 | 2.180211  | -0.134611 | 0.817428  |
| 5  | 6  | 0 | 3.419779  | -2.030204 | -0.659302 |
| 6  | 6  | 0 | 3.955291  | -3.079114 | -1.406743 |
| 7  | 6  | 0 | 5.312725  | -3.384153 | -1.307623 |
| 8  | 6  | 0 | 6.134715  | -2.640397 | -0.461111 |
| 9  | 6  | 0 | 5.599190  | -1.591530 | 0.286419  |
| 10 | 6  | 0 | 4.638850  | 1.279979  | -0.814310 |
| 11 | 6  | 0 | 5.180090  | 2.487721  | -1.254844 |
| 12 | 6  | 0 | 5.330126  | 3.550757  | -0.364368 |
| 13 | 6  | 0 | 4.938998  | 3.406168  | 0.966623  |
| 14 | 6  | 0 | 4.397837  | 2.198382  | 1.407199  |
| 15 | 6  | 0 | 1.559851  | 0.994684  | 0.283259  |
| 16 | 6  | 0 | 0.174441  | 1.019146  | 0.122975  |
| 17 | 6  | 0 | -0.590481 | -0.085703 | 0.496747  |
| 18 | 6  | 0 | 0.029868  | -1.215021 | 1.030819  |
| 19 | 6  | 0 | 1.415289  | -1.239460 | 1.191200  |
| 20 | 17 | 0 | 2.179910  | -2.631212 | 1.849488  |
| 21 | 17 | 0 | 4.453787  | -0.030105 | -1.911759 |
| 22 | 17 | 0 | 2.502607  | 2.356250  | -0.177514 |
| 23 | 17 | 0 | 6.612160  | -0.674893 | 1.329793  |
| 24 | 17 | 0 | 5.972633  | -4.676795 | -2.228797 |
| 25 | 17 | 0 | 5.997113  | 5.039139  | -0.907330 |
| 26 | 6  | 0 | -1.918413 | -0.062226 | 0.343073  |
| 27 | 17 | 0 | 3.915846  | 2.020069  | 3.047580  |
| 28 | 17 | 0 | 1.746879  | -1.654142 | -0.781544 |
| 29 | 6  | 0 | -2.566665 | -1.125605 | -0.285006 |
| 30 | 6  | 0 | -3.952059 | -1.101020 | -0.445420 |
| 31 | 6  | 0 | -4.689096 | -0.013147 | 0.022349  |
| 32 | 6  | 0 | -4.040873 | 1.050174  | 0.650504  |
| 33 | 6  | 0 | -2.655449 | 1.025648  | 0.810843  |
| 34 | 7  | 0 | -5.946499 | 0.009120  | -0.123242 |
| 35 | 6  | 0 | -6.530968 | 1.164541  | -0.664285 |
| 36 | 6  | 0 | -7.928997 | 1.293197  | -0.686538 |
| 37 | 6  | 0 | -8.808442 | 0.171969  | -0.178861 |
| 38 | 6  | 0 | -8.082405 | -1.074879 | 0.275805  |
| 39 | 6  | 0 | -6.679062 | -1.122901 | 0.265271  |
| 40 | 6  | 0 | -5.735106 | 2.229150  | -1.099184 |
| 41 | 6  | 0 | -6.321263 | 3.397414  | -1.590111 |
| 42 | 6  | 0 | -7.708513 | 3.516609  | -1.633394 |
| 43 | 6  | 0 | -8.511425 | 2.470808  | -1.179505 |

|    |   |   |            |           |           |
|----|---|---|------------|-----------|-----------|
| 44 | 6 | 0 | -8.813269  | -2.189507 | 0.714266  |
| 45 | 6 | 0 | -8.152378  | -3.336901 | 1.151660  |
| 46 | 6 | 0 | -6.759980  | -3.375840 | 1.162256  |
| 47 | 6 | 0 | -6.026524  | -2.269700 | 0.728922  |
| 48 | 6 | 0 | -9.757942  | -0.223026 | -1.302230 |
| 49 | 6 | 0 | -9.509076  | 0.719792  | 1.057476  |
| 50 | 1 | 0 | 3.307074   | -3.665728 | -2.074349 |
| 51 | 1 | 0 | 7.205243   | -2.880953 | -0.383007 |
| 52 | 1 | 0 | 5.488591   | 2.601806  | -2.304516 |
| 53 | 1 | 0 | 5.057285   | 4.244555  | 1.668845  |
| 54 | 1 | 0 | -0.314859  | 1.909763  | -0.298198 |
| 55 | 1 | 0 | -0.573401  | -2.086349 | 1.325527  |
| 56 | 1 | 0 | -1.985399  | -1.983574 | -0.653812 |
| 57 | 1 | 0 | -4.463335  | -1.939572 | -0.940826 |
| 58 | 1 | 0 | -4.622164  | 1.908071  | 1.019442  |
| 59 | 1 | 0 | -2.144170  | 1.864237  | 1.306182  |
| 60 | 1 | 0 | -4.639218  | 2.145472  | -1.054138 |
| 61 | 1 | 0 | -5.687252  | 4.224191  | -1.942915 |
| 62 | 1 | 0 | -8.170157  | 4.434925  | -2.025287 |
| 63 | 1 | 0 | -9.606623  | 2.569432  | -1.208028 |
| 64 | 1 | 0 | -9.912820  | -2.158089 | 0.712968  |
| 65 | 1 | 0 | -8.730083  | -4.210468 | 1.488021  |
| 66 | 1 | 0 | -6.237994  | -4.278633 | 1.512248  |
| 67 | 1 | 0 | -4.927202  | -2.300429 | 0.752361  |
| 68 | 1 | 0 | -9.171672  | -0.611563 | -2.164840 |
| 69 | 1 | 0 | -10.452029 | -1.013970 | -0.939711 |
| 70 | 1 | 0 | -10.343726 | 0.667354  | -1.622932 |
| 71 | 1 | 0 | -10.609417 | 0.723079  | 0.890125  |
| 72 | 1 | 0 | -9.269614  | 0.077329  | 1.934214  |
| 73 | 1 | 0 | -9.160387  | 1.758801  | 1.251503  |

---

## 5. Electroluminescence Performances

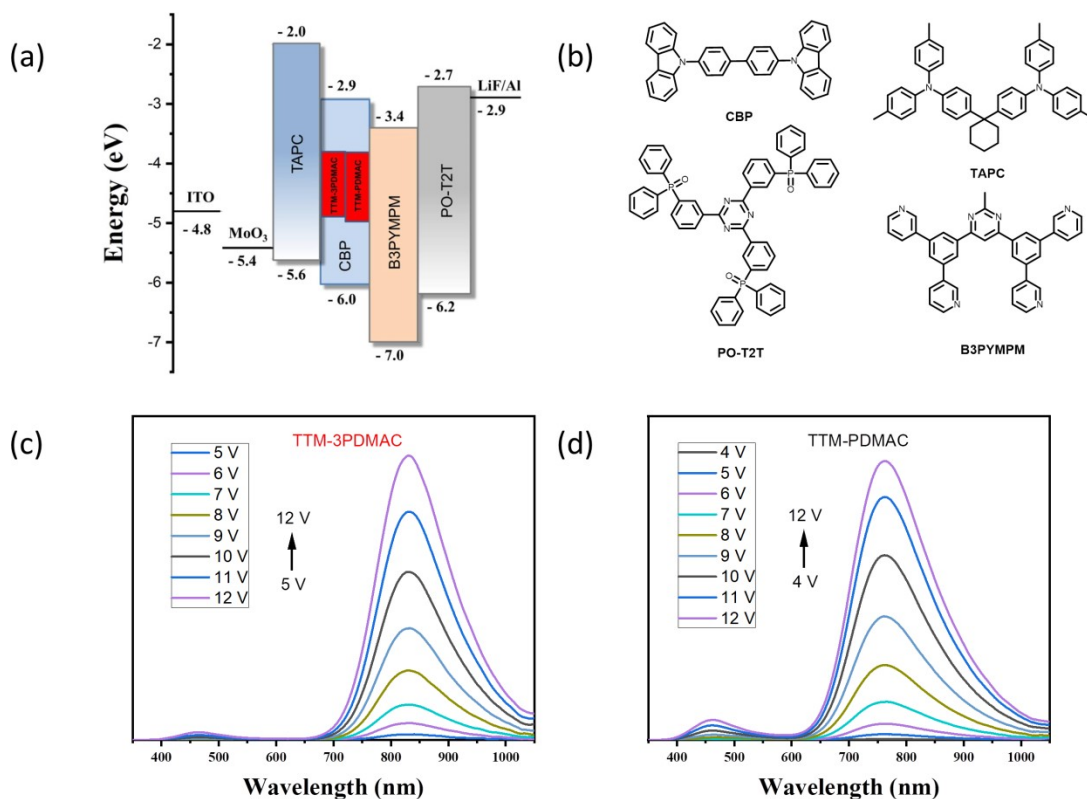

Figure S9. Energy-level diagram and electroluminescent properties of TTM-3PDMAC and TTM-PDMAC. a) Energy-level diagram of device; b) Materials used in this work; c) EL spectra of TTM-3PDMAC from 5-12V; d) EL spectra of TTM-PDMAC from 4-12V.

## 6. Summary of device performances of near infrared (NIR) OLED published to date

Table S2. Summary of the device performances of NIR OLED published to date with maximum electroluminescent (EL) wavelength over 800 nm.

| $\lambda_{\text{EL}}^{\text{max}}$ (nm) | EQE (%) | Emitter material   | [ref]     | $\lambda_{\text{EL}}^{\text{max}}$ (nm) | EQE (%) | Emitter material      | [ref] |
|-----------------------------------------|---------|--------------------|-----------|-----------------------------------------|---------|-----------------------|-------|
| 800                                     | 1.9     | metal free emitter | 4         | 800                                     | 1       | metal complex emitter | 5     |
| 802                                     | 0.43    | metal free emitter | 6         | 803                                     | 9.58    | metal complex emitter | 7     |
| 804                                     | 2.2     | metal free emitter | 8         | 811                                     | 0.97    | metal complex emitter | 9     |
| 810                                     | 0.51    | metal free emitter | 10        | 814                                     | 1.5     | metal complex emitter | 11    |
| 814                                     | 0.5     | metal free emitter | 12        | 826                                     | 0.49    | metal complex emitter | 13    |
| 823                                     | 0.27    | metal free emitter | 14        | 847                                     | 0.19    | metal complex emitter | 15    |
| 824                                     | 0.16    | metal free emitter | 16        | 848                                     | 2.8     | metal complex emitter | 17    |
| 828                                     | 0.41    | metal free emitter | 10        | 846                                     | 1.5     | metal complex emitter | 17    |
| 830                                     | 2.47    | metal free emitter | 18        | 855                                     | 1       | metal complex emitter | 19    |
| 830                                     | 3.1     | metal free emitter | this work | 890                                     | 3.8     | metal complex emitter | 20    |
| 838                                     | 0.58    | metal free emitter | 21        | 900                                     | 3.8     | metal complex emitter | 22    |
| 840                                     | 1.12    | metal free emitter | 23        | 920                                     | 1.9     | metal complex emitter | 24    |
| 840                                     | 3.8     | metal free emitter | 25        | 1005                                    | 0.2     | metal complex emitter | 22    |
| 850                                     | 0.14    | metal free emitter | 14        | 1060                                    | 0.022   | metal complex emitter | 26    |
| 852                                     | 0.3     | metal free emitter | 10        | 1060                                    | 0.3     | metal complex emitter | 27    |
| 864                                     | 0.2     | metal free emitter | 6         |                                         |         |                       |       |

|      |       |                    |    |  |  |  |  |
|------|-------|--------------------|----|--|--|--|--|
| 868  | 0.09  | metal free emitter | 14 |  |  |  |  |
| 870  | 0.02  | metal free emitter | 14 |  |  |  |  |
| 883  | 0.1   | metal free emitter | 28 |  |  |  |  |
| 890  | 0.015 | metal free emitter | 29 |  |  |  |  |
| 894  | 0.23  | metal free emitter | 10 |  |  |  |  |
| 895  | 0.091 | metal free emitter | 30 |  |  |  |  |
| 901  | 1.1   | metal free emitter | 31 |  |  |  |  |
| 904  | 0.019 | metal free emitter | 32 |  |  |  |  |
| 905  | 1.32  | metal free emitter | 33 |  |  |  |  |
| 916  | 0.07  | metal free emitter | 21 |  |  |  |  |
| 939  | 0.006 | metal free emitter | 30 |  |  |  |  |
| 960  | 0.009 | metal free emitter | 28 |  |  |  |  |
| 990  | 0.018 | metal free emitter | 30 |  |  |  |  |
| 1010 | 0.003 | metal free emitter | 34 |  |  |  |  |
| 1050 | 0.05  | metal free emitter | 35 |  |  |  |  |
| 1050 | 0.16  | metal free emitter | 36 |  |  |  |  |
| 1050 | 0.33  | metal free emitter | 36 |  |  |  |  |
| 1080 | 0.73  | metal free emitter | 36 |  |  |  |  |

## 7. References

1. Q. Peng, A. Obolda, M. Zhang and F. Li, *Angewandte Chemie*, 2015, **127**, 7091-7095.
2. T. Y. Sae Youn Lee, Hideaki Komiyama, Jiyoung Lee, and Chihaya Adachi *Advanced Materials*, 2016, **28**, 4019-4024.
3. J. Z. Shimin Hu, Xiangyu Zhu, Jingjing Guo, Shuming Chen, Zujin Zhao, and Ben Zhong Tang, *ACS applied materials & interfaces*, 2019, **11**, 27134-27144.
4. M. T. Sharbati, F. Panahi, A. Shourvarzi, S. Khademi and F. Emami, *Optik*, 2013, **124**, 52-54.
5. F. Nisic, A. Colombo, C. Dragonetti, D. Roberto, A. Valore, J. M. Malicka, M. Cocchi, G. R. Freeman and J. A. G. Williams, *Journal of Materials Chemistry C*, 2014, **2**, 1791-1800.
6. X. Du, J. Qi, Z. Zhang, D. Ma and Z. Y. Wang, *Chemistry of Materials*, 2012, **24**, 2178-2185.
7. S. F. Wang, Y. Yuan, Y. C. Wei, W. H. Chan, L. W. Fu, B. K. Su, I. Y. Chen, K. J. Chou, P. T. Chen, H. F. Hsu, C. L. Ko, W. Y. Hung, C. S. Lee, P. T. Chou and Y. Chi, *Advanced Functional Materials*, 2020, **30**.
8. Y. Yu, H. Xing, D. Liu, M. Zhao, H. H. Sung, I. D. Williams, J. W. Y. Lam, G. Xie, Z. Zhao and B. Z. Tang, *Angew Chem Int Ed Engl*, 2022, **61**, e202204279.
9. Z. L. Zhu, S. F. Wang, L. W. Fu, J. H. Tan, C. Cao, Y. Yuan, S. M. Yiu, Y. X. Zhang, Y. Chi and C. S. Lee, *Chemistry*, 2022, **28**, e202103202.
10. J.-F. Cheng, Z.-H. Pan, K. Zhang, Y. Zhao, C.-K. Wang, L. Ding, M.-K. Fung and J. Fan, *Chemical Engineering Journal*, 2022, **430**, 132744.
11. T.-C. Lee, J.-Y. Hung, Y. Chi, Y.-M. Cheng, G.-H. Lee, P.-T. Chou, C.-C. Chen, C.-H. Chang and C.-C. Wu, *Advanced Functional Materials*, 2009, **19**, 2639-2647.
12. R. T. F. Yixing Yang, Timothy T. Steckler, Sang Hyun Eom, John R. Reynolds, Kirk S. Schanze, and Jiangeng Xue, *APPLIED PHYSICS LETTERS*, 2008, **93**, 163305.
13. Y. Zhang, Z. Chen, X. Wang, J. He, J. Wu, H. Liu, J. Song, J. Qu, W. T. Chan and W. Y. Wong, *Inorg Chem*, 2018, **57**, 14208-14217.
14. Z. Z. Gang Qian, Min Luo, Dengbin Yu, Zhiqiang Zhang, Dongge Ma, and Zhi Yuan Wang, *J. Phys. Chem. C*, 2009, **113**, 1589-1595.
15. Y. Zhang, Q. Li, M. Cai, J. Xue and J. Qiao, *Journal of Materials Chemistry C*, 2020, **8**, 8484-8492.



16. X. Q. Wang, Y. Hu, Y. J. Yu, Q. S. Tian, W. S. Shen, W. Y. Yang, Z. Q. Jiang and L. S. Liao, *J Phys Chem Lett*, 2021, **12**, 6034-6040.
17. L. Huang, C. D. Park, T. Fleetham and J. Li, *Applied Physics Letters*, 2016, **109**, 23302.
18. L. Tejerina, A. G. Rapis, M. Rickhaus, P. Murto, Z. Genene, E. Wang, A. Minotto, H. L. Anderson and F. Cacialli, *J Mater Chem C Mater*, 2022, **10**, 5929-5933.
19. E. Rossi, A. Colombo, C. Dragonetti, D. Roberto, F. Demartin, M. Cocchi, P. Brulatti, V. Fattori and J. A. Williams, *Chem Commun (Camb)*, 2012, **48**, 3182-3184.
20. J. R. Sommer, R. T. Farley, K. R. Graham, Y. Yang, J. R. Reynolds, J. Xue and K. S. Schanze, *ACS Appl Mater Interfaces*, 2009, **1**, 274-278.
21. Y. J. Yu, Y. Hu, S. Y. Yang, W. Luo, Y. Yuan, C. C. Peng, J. F. Liu, A. Khan, Z. Q. Jiang and L. S. Liao, *Angew Chem Int Ed Engl*, 2020, **59**, 21578-21584.
22. K. R. Graham, Y. Yang, J. R. Sommer, A. H. Shelton, K. S. Schanze, J. Xue and J. R. Reynolds, *Chemistry of Materials*, 2011, **23**, 5305-5312.
23. A. Minotto, P. Murto, Z. Genene, A. Zampetti, G. Carnicella, W. Mammo, M. R. Andersson, E. Wang and F. Cacialli, *Adv Mater*, 2018, DOI: 10.1002/adma.201706584, e1706584.
24. J. L. Linyu Cao, Zhi-Qiang Zhu, Liang Huang, and Jian Li, *ACS Appl Mater Interfaces*, 2021, **13**, 60261-60268.
25. A. Shahalizad, A. Malinge, L. Hu, G. Laflamme, L. Haeberlé, D. M. Myers, J. Mao, W. G. Skene and S. Kéna - Cohen, *Advanced Functional Materials*, 2020, **31**, 2007119.
26. A. D. A. Afshin Shahalizad, Chantal Andraud, Muhammad Hasnan Sazzad, and Y. T. Dae-Hyeon Kim, Jean-Charles Ribierre, Jean-Michel Nunzi, Chihaya Adachi, *Organic Electronics*, 2017, **44**, 50-58.
27. F. D. Zhu-Qi Chen, Zu-Qiang Bian, Chun-Hui Huang, *Organic Electronics*, 2010, **11**, 369-376.
28. O. Fenwick, J. K. Sprafke, J. Binas, D. V. Kondratuk, F. Di Stasio, H. L. Anderson and F. Cacialli, *Nano Lett*, 2011, **11**, 2451-2456.
29. Y. Xuan, G. Qian, Z. Wang and D. Ma, *Thin Solid Films*, 2008, **516**, 7891-7893.
30. G. Tregnago, T. T. Steckler, O. Fenwick, M. R. Andersson and F. Cacialli, *Journal of Materials Chemistry C*, 2015, **3**, 2792-2797.
31. U. Balijapalli, R. Nagata, N. Yamada, H. Nakanotani, M. Tanaka, A. D'Aleo, V. Placide, M. Mamada, Y. Tsuchiya and C. Adachi, *Angew Chem Int Ed Engl*, 2021, **60**, 8477-8482.
32. D. G. Congrave, B. H. Drummond, P. J. Conaghan, H. Francis, S. T. E. Jones, C. P. Grey, N. C. Greenham, D. Credginton and H. Bronstein, *J Am Chem Soc*, 2019, **141**, 18390-18394.
33. M. T. Sharbati, F. Panahi and A. Gharavi, *IEEE Photonics Technology Letters*, 2010, **22**, 1695-1697.
34. Q. Liang, J. Xu, J. Xue and J. Qiao, *Chem Commun (Camb)*, 2020, **56**, 8988-8991.
35. B. D. Gang Qian, Min Luo, Dengbin Yu, Jie Zhan, Zhiqiang Zhang, and a. Z. Y. W. Dongge Ma, *Chem. Mater.*, 2008, **20**, 6208-6216.
36. G. Qian, Z. Zhong, M. Luo, D. Yu, Z. Zhang, Z. Y. Wang and D. Ma, *Advanced Materials*, 2009, **21**, 111-116.
